# Supplementary material for: Chemoenzymatic synthesis of 3-ethyl-2,5-dimethylpyrazine by L-threonine 3-dehydrogenase and 2-amino-3-ketobutyrate CoA ligase/L-threonine aldolase
Source: PubMed Central journal article supplement (PMC9814548; doi:10.1038/s42004-021-00545-8), 2021-07-16
Supplement: 42004_2021_545_MOESM1_ESM.pdf [file 42004_2021_545_MOESM1_ESM.pdf]

# Supplementary Information

## Chemoenzymatic synthesis of 3-ethyl-2,5-dimethylpyrazine by L-threonine 3-dehydrogenase and 2-amino-3-ketobutyrate CoA ligase/L-threonine aldolase

Tomoharu Motoyama<sup>1</sup>, Shogo Nakano<sup>1,2,\*</sup>, Fumihito Hasebe<sup>1</sup>, Ryo Miyata<sup>1</sup>,  
Shigenori Kumazawa<sup>1</sup>, Noriyuki Miyoshi<sup>1</sup> and Sohei Ito<sup>1,\*</sup>

<sup>1</sup> Graduate School of Integrated Pharmaceutical and Nutritional Sciences, University of  
Shizuoka, Shizuoka, Japan

<sup>2</sup> PREST, Japan Science and Technology Agency

\*To whom correspondence may be addressed: Graduate School of Integrated  
Pharmaceutical and Nutritional Sciences, University of Shizuoka, Shizuoka, Japan, Tel.:  
+81-54-264-5528 (Ext.); Fax: +81-54-264-5528, E-mail: [snakano@u-shizuoka-ken.ac.jp](mailto:snakano@u-shizuoka-ken.ac.jp)

ORCID ID: 0000-0002-6614-7158

\*To whom correspondence may be addressed: Graduate School of Integrated  
Pharmaceutical and Nutritional Sciences, University of Shizuoka, Shizuoka, Japan, Tel.:  
+81-54-264-5576 (Ext.); Fax: +81-54-264-5576, E-mail: [itosohei@u-shizuoka-ken.ac.jp](mailto:itosohei@u-shizuoka-ken.ac.jp)

ORCID ID: 0000-0002-9937-3100

|    |                                                                                                                  |     |
|----|------------------------------------------------------------------------------------------------------------------|-----|
| 25 | <b>Contents</b>                                                                                                  |     |
| 26 | <b>Supplementary Methods</b>                                                                                     |     |
| 27 | Large-scale preparation and purification of chemoenzymatically synthesized EDMP                                  |     |
| 28 | for NMR analysis.                                                                                                | S4  |
| 29 | Determination of the yields of EDMP by chemical and chemoenzymatic methods.                                      | S4  |
| 30 |                                                                                                                  |     |
| 31 | <b>Supplementary Figures</b>                                                                                     |     |
| 32 | Schematic view of <i>tdh</i> and <i>kbl</i> operons in <i>Thermonaerovibrio acidaminovorans</i> DSM              |     |
| 33 | 6589, <i>Bacillus subtilis</i> subsp. <i>subtilis</i> str. 168, and <i>Vibrio cholerae</i> 01 biovar E1 Tor str. |     |
| 34 | N16961.                                                                                                          | S5  |
| 35 | GC-MS analysis of reaction product from L-Thr using CnTDH and CnKBL.                                             | S6  |
| 36 | <sup>1</sup> H NMR and <sup>13</sup> C NMR spectra for chemoenzymatically synthesized EDMP.                      | S7  |
| 37 | Calibration curve of EDMP in GC-MS.                                                                              | S8  |
| 38 | Detection of Gly by LC-HRMS.                                                                                     | S9  |
| 39 | GC-MS analysis of reaction product from L-Thr using TaTDH and TaKBL.                                             | S10 |
| 40 | Reaction scheme to evaluate TA activity of CnKBL.                                                                | S11 |
| 41 | Substrates used for UV-Vis spectra analysis of CnKBL.                                                            | S12 |
| 42 | Reaction scheme to evaluate KBL activity of CnKBL.                                                               | S13 |
| 43 | Characterization of KBL activity for CnKBL.                                                                      | S14 |
| 44 | Superposed structures of CnKBL and EcKBL.                                                                        | S15 |
| 45 | Superposed structures of CnKBL and eTA.                                                                          | S16 |
| 46 | HPLC analysis of EDMP and DMP production with or without pre-reaction.                                           | S17 |
| 47 | Comparison of the yield of EDMP and DMP with different timing of acetaldehyde                                    |     |
| 48 | addition.                                                                                                        | S18 |
| 49 | MS spectrum for 2,3,5-trimethylpyrazine.                                                                         | S19 |
| 50 | MS spectrum for 3-ethyl-2,5-dimethylpyrazine (EDMP).                                                             | S20 |
| 51 | MS spectrum for 2,5-dimethyl-3-propylpyrazine.                                                                   | S21 |
| 52 | MS spectrum for 3-butyl-2,5-dimethylpyrazine.                                                                    | S22 |
| 53 | MS spectrum for 3-isopentyl-2,5-dimethylpyrazine.                                                                | S23 |
| 54 | MS spectrum for 2,5-dimethyl-3-pentylpyrazine.                                                                   | S24 |
| 55 | MS spectrum for 3-decyl-2,5-dimethylpyrazine.                                                                    | S25 |
| 56 | MS spectrum for 3-benzyl-2,5-dimethylpyrazine.                                                                   | S26 |
| 57 | GC-MS analysis of EDMP using aminoacetone and acetaldehyde at low                                                |     |
| 58 | concentration.                                                                                                   | S27 |
| 59 |                                                                                                                  |     |

|    |                                                                     |     |
|----|---------------------------------------------------------------------|-----|
| 60 | <b>Supplementary Tables</b>                                         |     |
| 61 | Primers used in this study.                                         | S28 |
| 62 | Annotation of TDH homologues.                                       | S29 |
| 63 | Annotation of KBL homologues.                                       | S29 |
| 64 | Enzymatic properties of CnKBL and EcKBL for KBL activity.           | S30 |
| 65 | Enzymatic properties of CnKBL(WT) and two variants for TA activity. | S30 |
| 66 | Yields of EDMP and DMP under chemical or chemoenzymatic reactions.  | S31 |

## 67 **Supplementary Methods**

### 68 **Large-scale preparation and purification of chemoenzymatically synthesized** 69 **EDMP for NMR analysis.**

70 The chemoenzymatic reaction was performed using 56.3 mM L-Thr, 37.5 mM NAD<sup>+</sup>,  
71 and 100 mM potassium phosphate buffer (pH 8.0) at a total scale of 100 mL. To  
72 initiate the reaction, 0.05 mM CnKBL was added to reaction mixture. The reaction  
73 was performed for 6 h at 30 °C. After CnKBL reaction, 0.05 mM CnTDH was added to  
74 reaction mixture. The reaction was performed for 12 h at 30 °C. The produced EDMP  
75 was extracted three times with diethyl ether. The combined organic layers were dried  
76 Na<sub>2</sub>SO<sub>4</sub> and the solvents were removed under reduced pressure. Silica-gel column  
77 chromatography was carried out using silica gel 60N (230–400 mesh, Kanto  
78 Chemical, Tokyo, Japan). The isolated EDMP was analyzed by nuclear magnetic  
79 resonance (NMR). NMR spectra were acquired on a Bruker Biospin AVANCE-III (400  
80 MHz) spectrometer (Bruker BioSpin, Rheinstetten, Germany), with chemical shifts  
81 expressed in ppm. **TLC** (hexane/diethyl ether 1:1): *R<sub>f</sub>* = 0.31. **<sup>1</sup>H NMR** (400 MHz,  
82 CDCl<sub>3</sub>): δ = 1.26 (t, *J* = 7.6 Hz, 3H), 2.48 (s, 3H), 2.52 (s, 3H), 2.79 (q, *J* = 7.6 Hz, 2H),  
83 8.14 (s, 1H). **<sup>13</sup>C NMR** (100 MHz, CDCl<sub>3</sub>): δ = 12.6, 21.0 (2C), 28.2, 140.6, 148.3,  
84 150.1, 155.7. <sup>1</sup>H NMR and <sup>13</sup>C NMR spectra for EDMP are shown in Supplementary  
85 Fig. 3.

86

### 87 **Determination of the yields of EDMP by chemical and chemoenzymatic** 88 **methods.**

89 The reaction conditions are basically the same as in the sections "Enzymatic  
90 reaction using CnTDH and CnKBL" and "Chemoenzymatic reaction using CnTDH  
91 and aldehydes " in the main text. In brief, the chemical reactions were carried out  
92 using 5.0 mM aminoacetone and 2.5 mM acetaldehyde. In the chemoenzymatic  
93 reaction, the enzymes were reacted with 2.5-7.5 mM L-Thr with or without chemical  
94 reagents. The term "pre-reaction" is defined as the condensation of aminoacetone in  
95 the absence of acetaldehyde to form an intermediate. These methods were used in  
96 Supplementary Figure 13, Figure 14, and Supplementary Table 6.

97

98

99

100

101

*Thermanaerovibrio acidaminovorans* DSM 6589

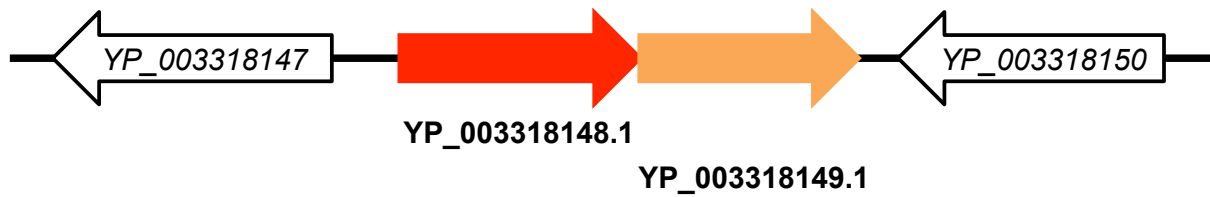

*Bacillus subtilis* subsp. *subtilis* str. 168

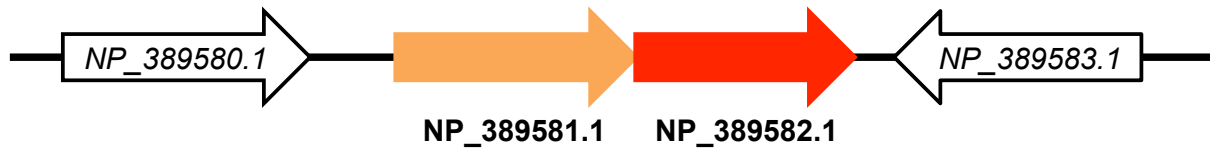

*Vibrio cholerae* 01 biovar E1 Tor str. N16961

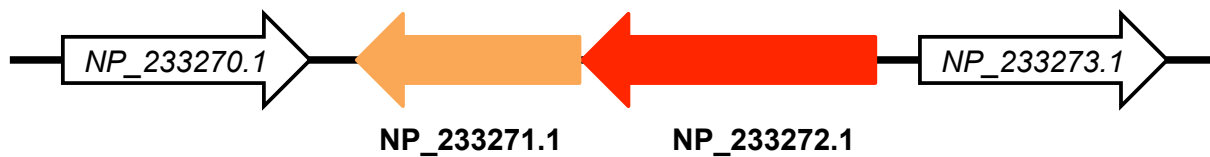

102

103 **Supplementary Fig. 1 Schematic view of *tdh* and *kbl* operons in**  
104 ***Thermanaerovibrio acidaminovorans* DSM 6589, *Bacillus subtilis* subsp.**  
105 ***subtilis* str. 168, and *Vibrio cholerae* 01 biovar E1 Tor str. N16961.**

106 *tdh* and *kbl* genes are colored by orange and red, respectively.

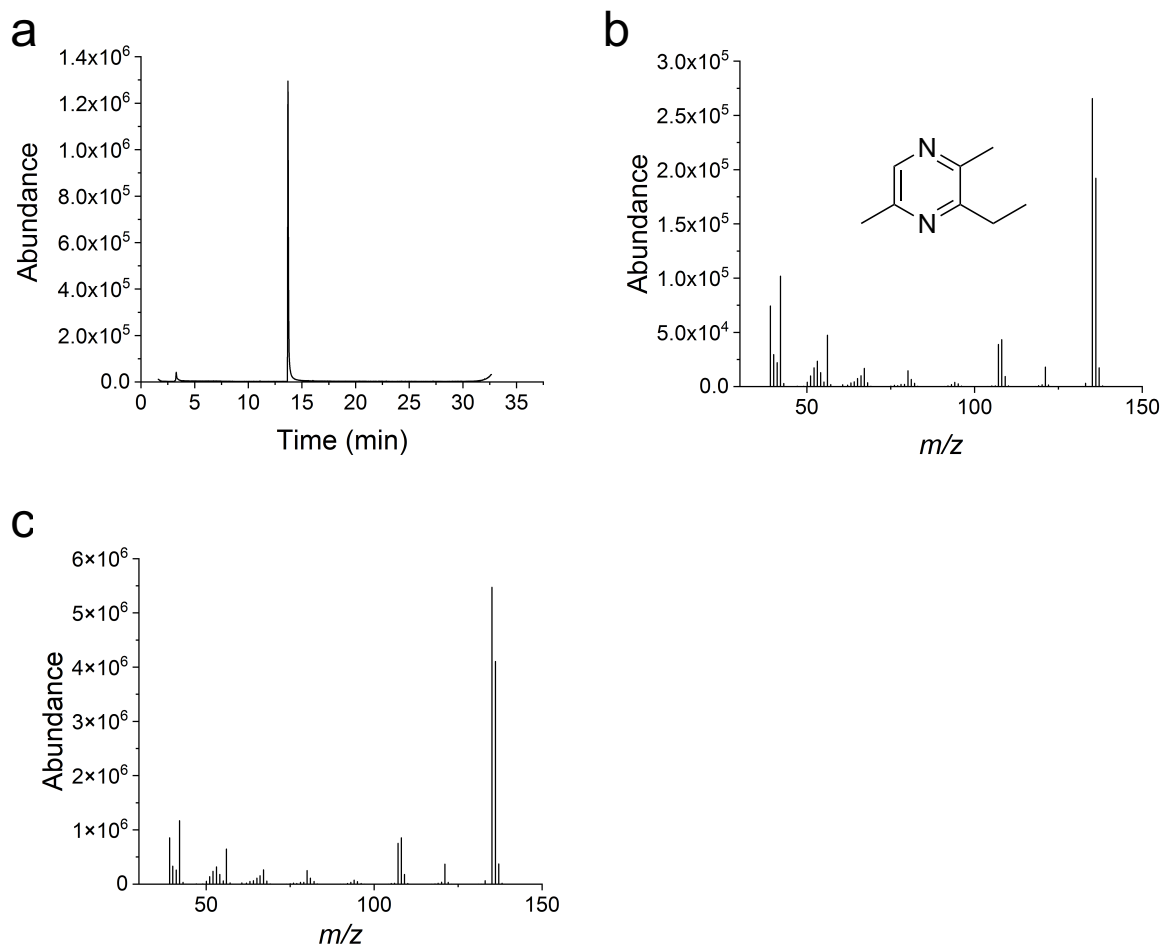

107

108 **Supplementary Fig. 2 GC-MS analysis of reaction product from L-Thr using**  
 109 **CnTDH and CnKBL.**

110 Chromatogram and mass spectrum are shown (a) and (b), respectively. Enzyme  
 111 reaction using purified CnTDH and CnKBL was performed using assay buffer A [100  
 112 mM potassium phosphate (pH 8.0), 10 mM L-Thr and 5 mM NAD<sup>+</sup>]. To start the  
 113 reaction, 0.05 mM CnTDH and CnKBL were added to assay buffer A. The enzyme  
 114 reaction was performed for 3 h at 30°C. After the enzyme reaction, reaction mixture  
 115 was provided to a GC-MS analysis. The *m/z* of EDMP standard is shown (c).  
 116 Comparison of reaction product to the EDMP standard indicated that reaction product  
 117 is EDMP.

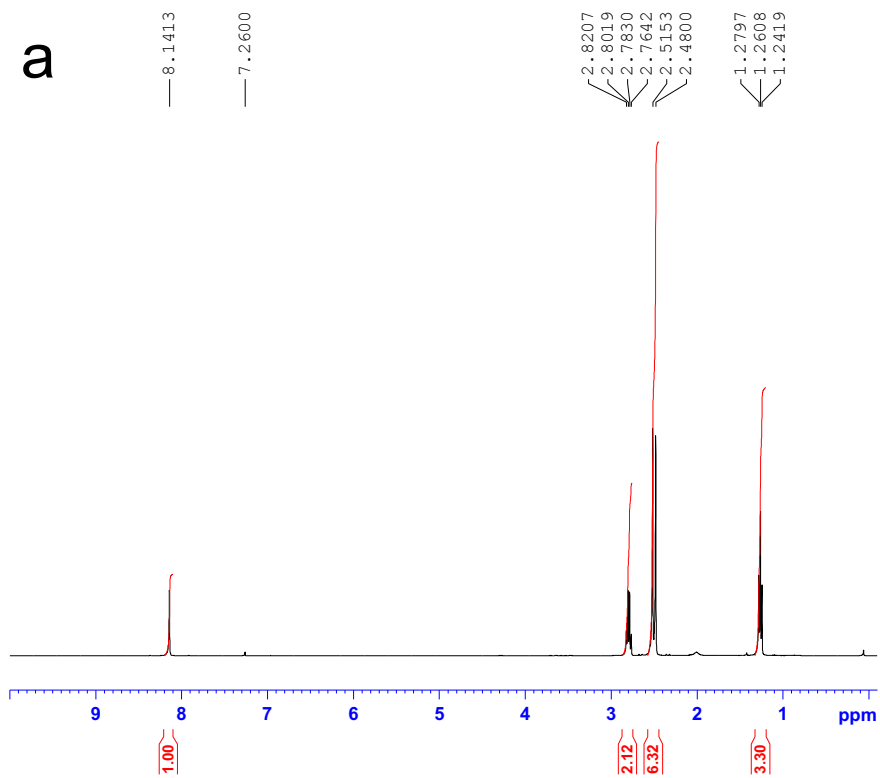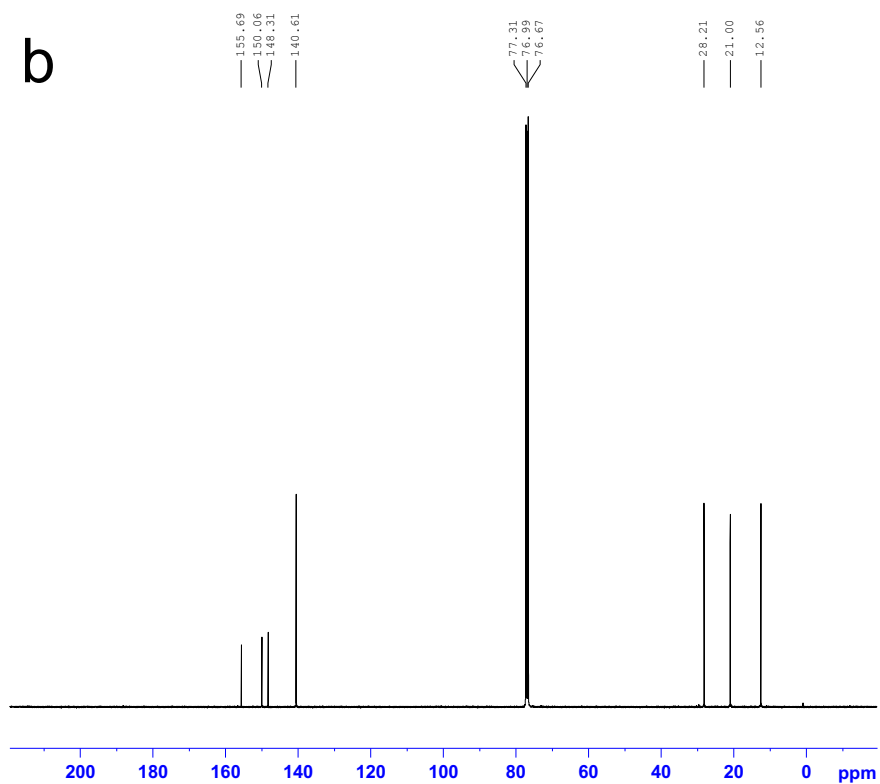

118

119 **Supplementary Fig. 3  $^1\text{H}$  NMR and  $^{13}\text{C}$  NMR spectra for chemoenzymatically**  
 120 **synthesized EDMP.**

121  $^1\text{H}$  NMR and  $^{13}\text{C}$  NMR spectra for EDMP are shown (a) and (b), respectively.

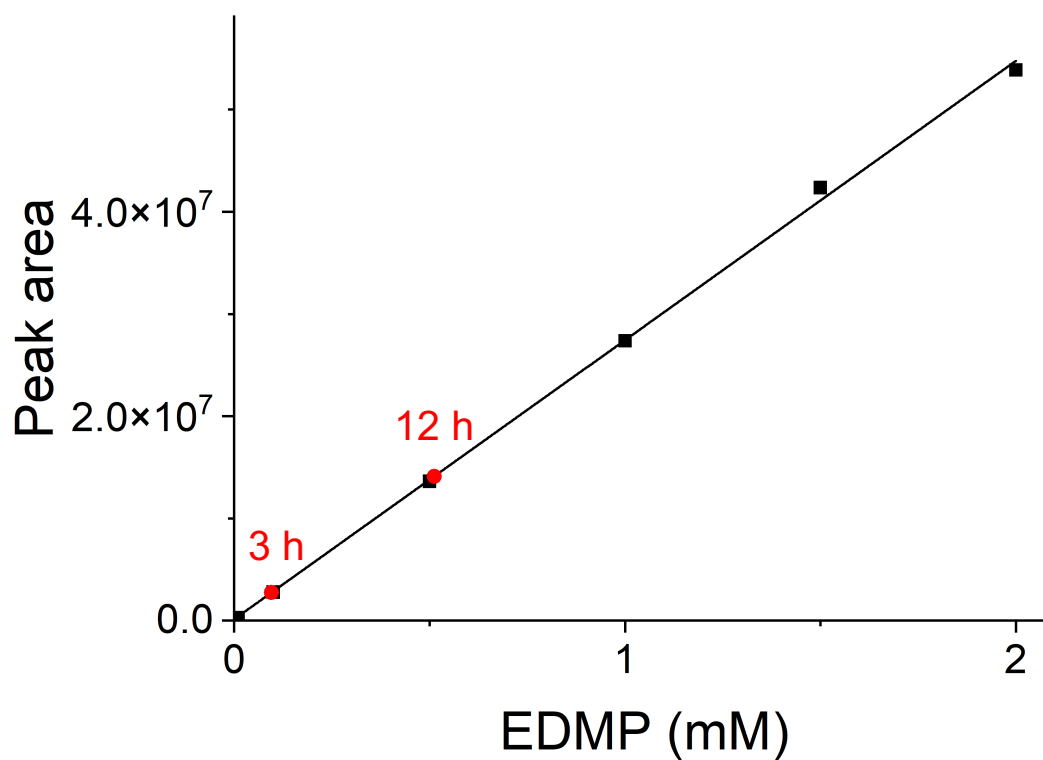

122

123 **Supplementary Fig. 4 Calibration curve of EDMP in GC-MS.**

124 Calibration curve was obtained using 0.01–2.0 mM EDMP standard. EDMP standard  
125 and produced EDMP using CnTDH and CnKBL from L-Thr (reaction time: 3 and 12 h)  
126 are shown black and red, respectively.



127

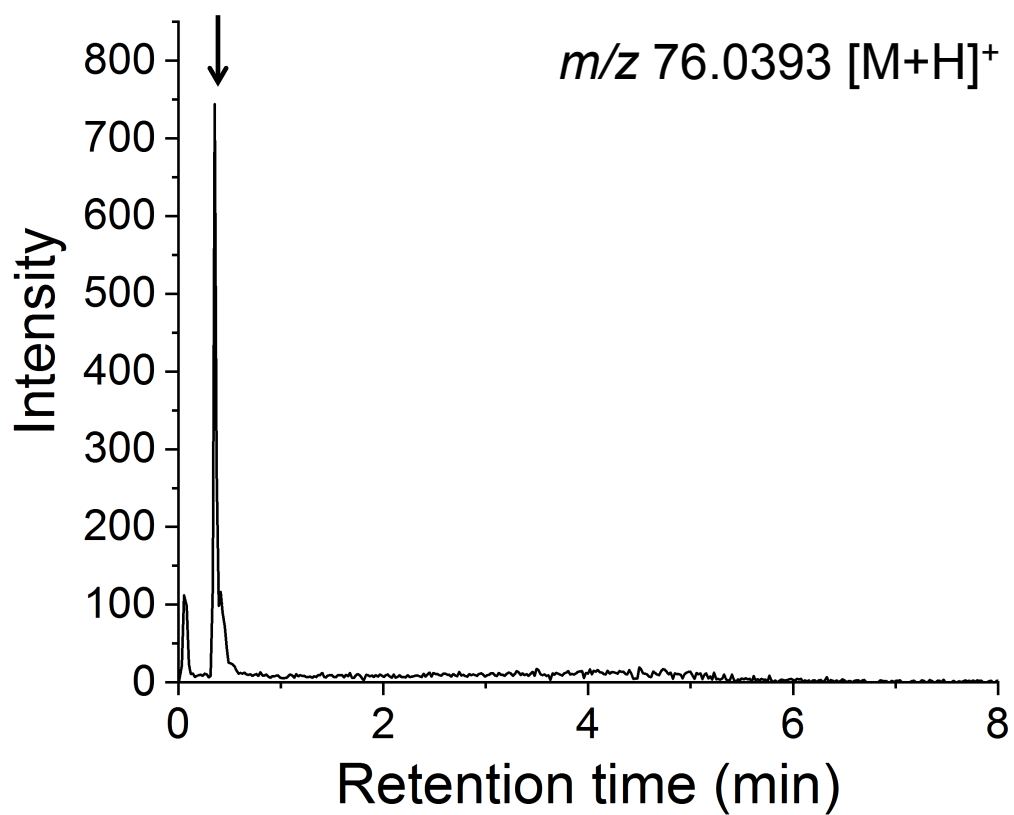

128

129 **Supplementary Fig. 5 Detection of Gly by LC-HRMS.**

130 Extracted ion count chromatograms of  $m/z$  76.0393  $\pm$  0.0020 [M+H]<sup>+</sup> are shown. The

131 peak of Gly is represented as an arrow.

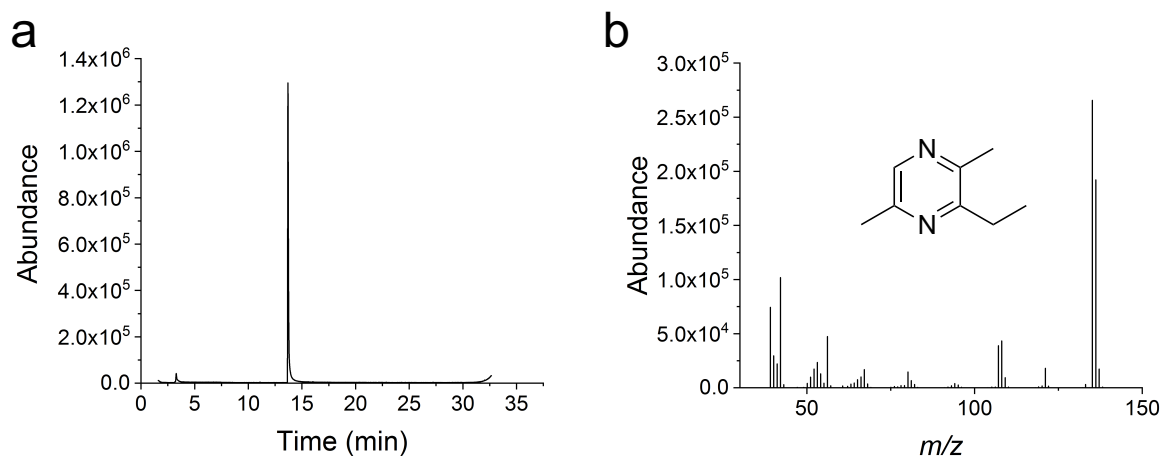

132

133 **Supplementary Fig. 6 GC-MS analysis of reaction product from L-Thr using**  
 134 **TaTDH and TaKBL.**

135 Chromatogram and mass spectrum are shown (a) and (b), respectively. Enzyme  
 136 reaction using purified TaTDH and TaKBL was performed using assay buffer A [100  
 137 mM potassium phosphate (pH 8.0), 10 mM L-Thr and 5 mM NAD<sup>+</sup>]. To start the  
 138 reaction, 0.05 mM TaTDH and TaKBL were added to assay buffer A. The enzyme  
 139 reaction was performed for 3 h at 30°C. After the enzyme reaction, reaction mixture  
 140 was provided to a GC-MS analysis.

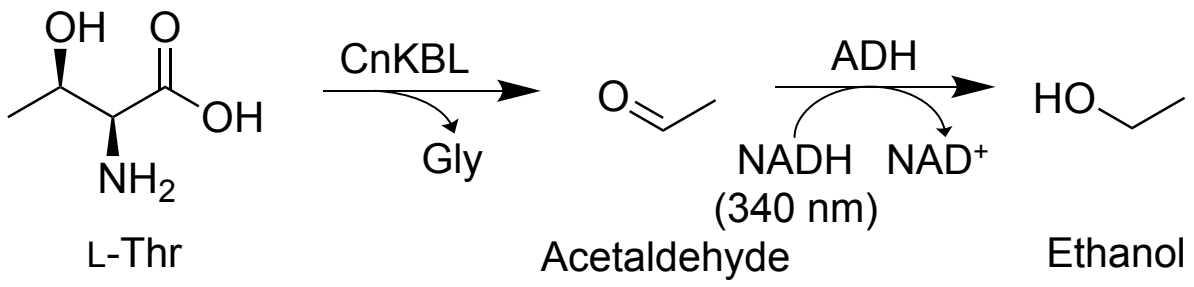

**Supplementary Fig. 7 Reaction scheme to evaluate TA activity of CnKBL.**

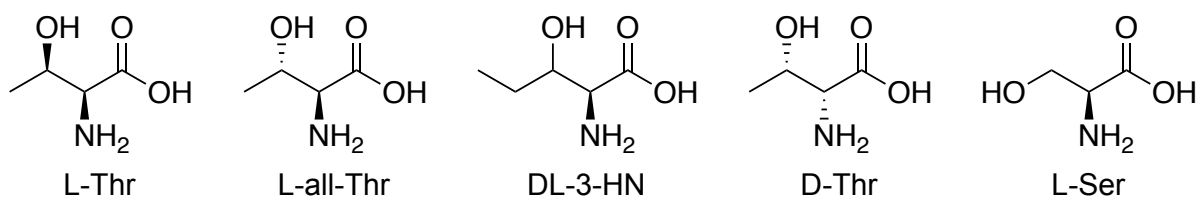

143

144

**Supplementary Fig. 8 Substrates used for UV-Vis spectra analysis of CnKBL.**

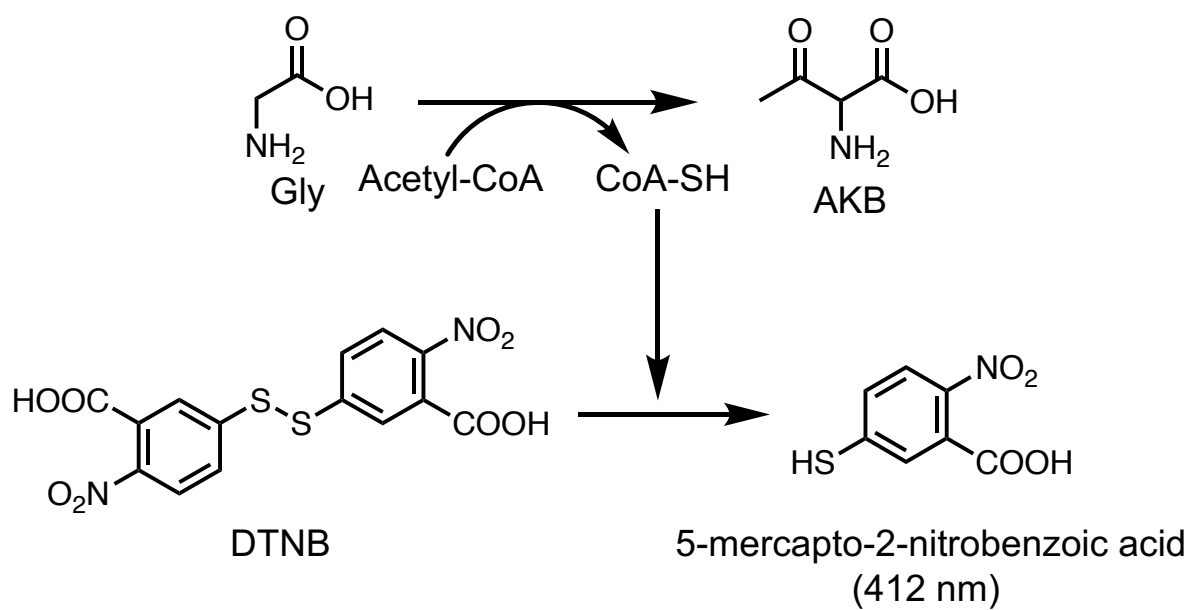

145

146 **Supplementary Fig. 9 Reaction scheme to evaluate KBL activity of CnKBL.**

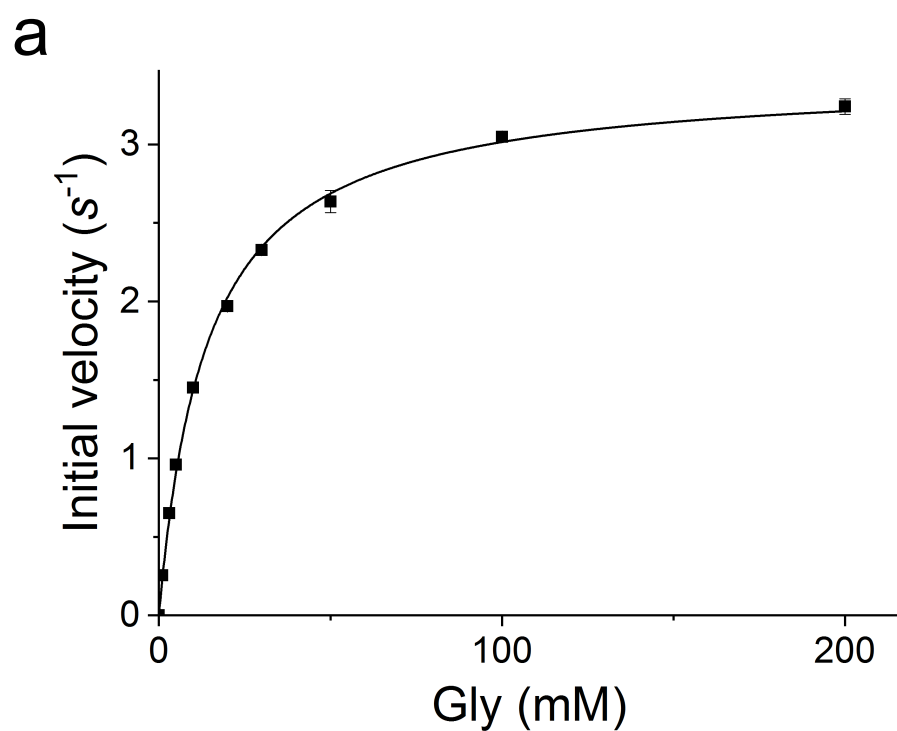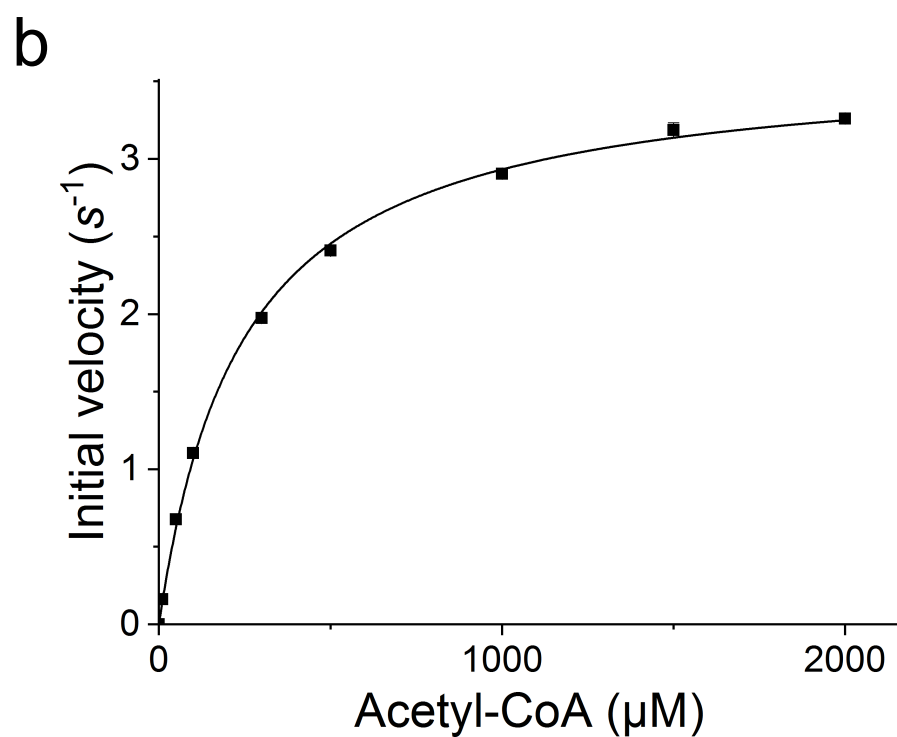

147

148 **Supplementary Fig. 10 Characterization of KBL activity for CnKBL.**

149 Enzyme kinetic plots of KBL activity of CnKBL toward Gly (a) and Acetyl-CoA (b). The

150 data are represented as mean  $\pm$  standard deviation. Kinetic parameters are listed in

151 Supplementary Table 4.

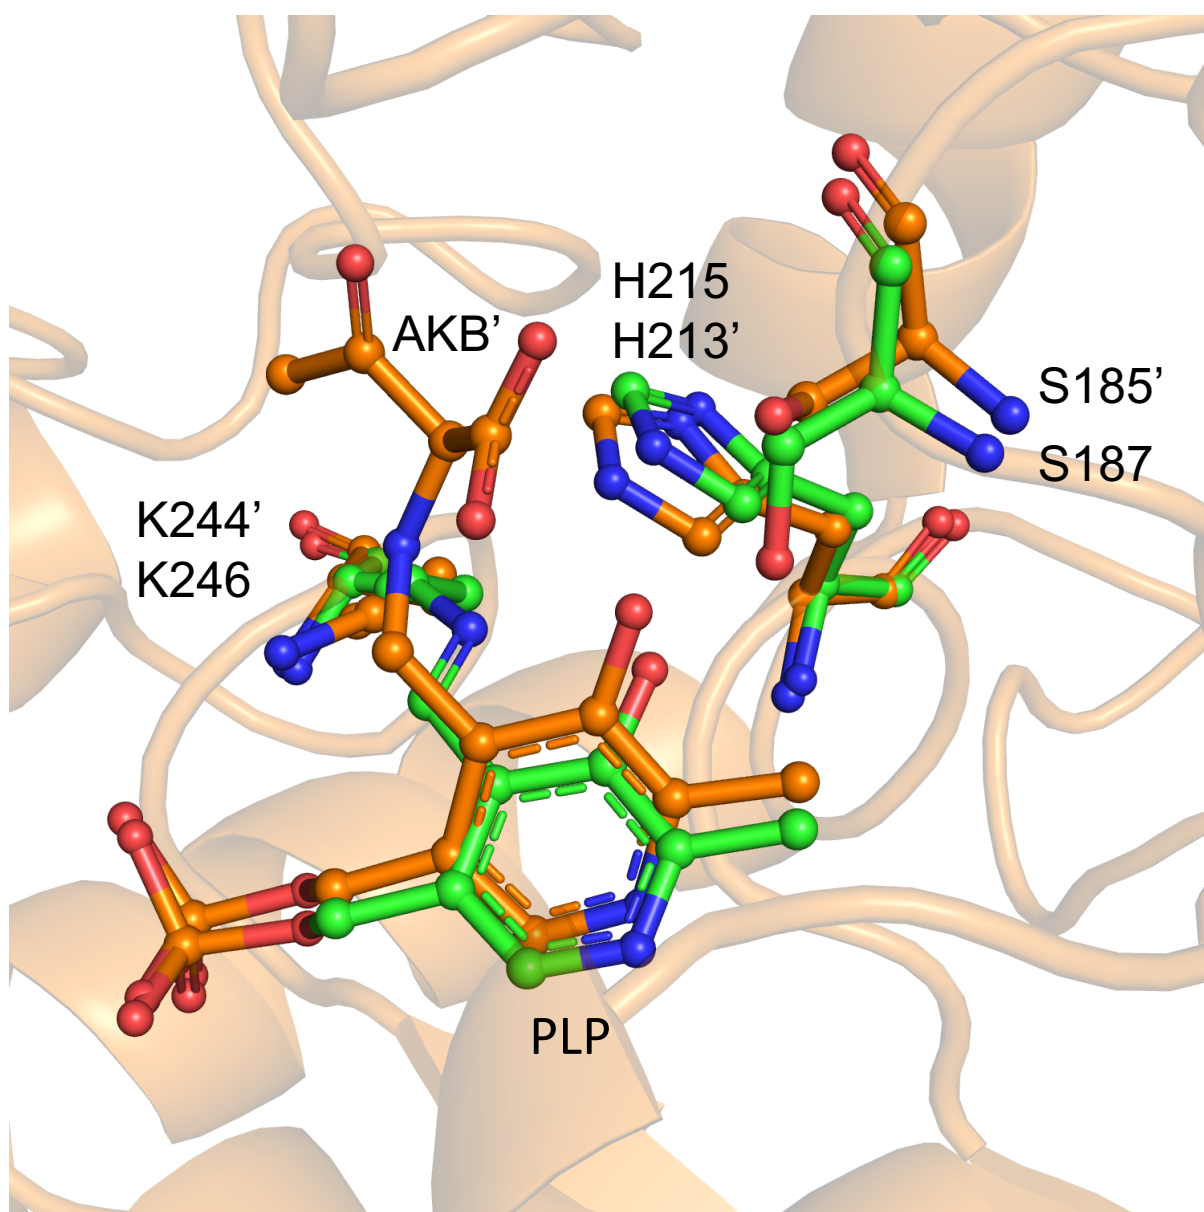

152

153 **Supplementary Fig. 11 Superposed structures of CnKBL and EckBL.**

154 CnKBL and EckBL (PDB entry 1FC4) are colored green and orange, respectively.

155 Residues in EckBL are marked by using single-quotation. Conserved residues

156 between CnKBL and EckBL are represented as stick model.

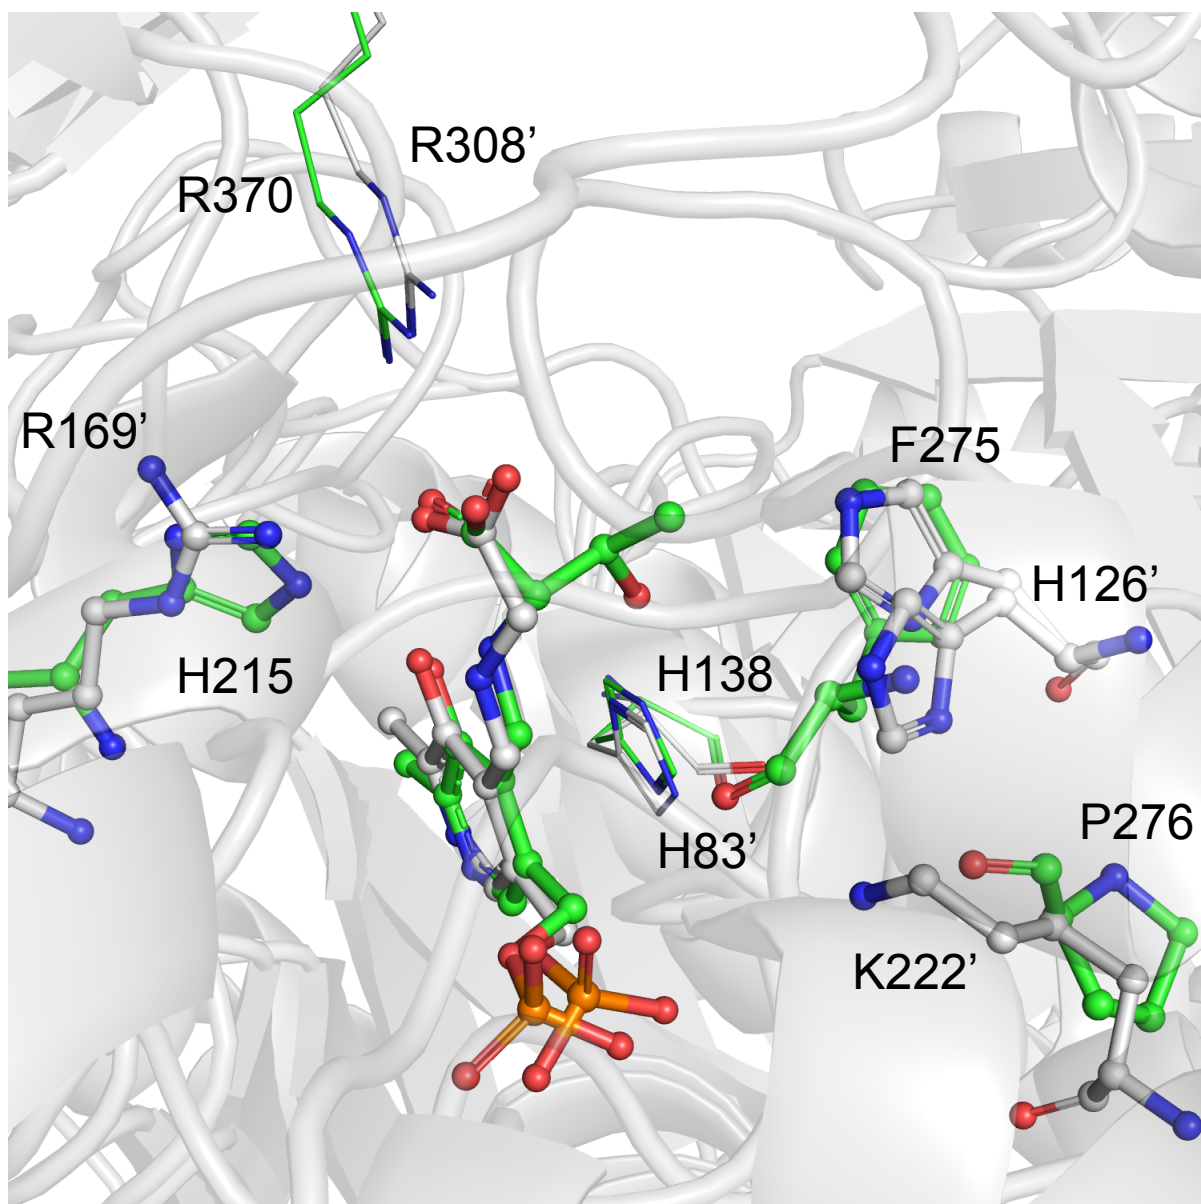

157

158 **Supplementary Fig. 12 Superposed structures of CnKBL and eTA.**

159 CnKBL and eTA (PDB entry 4LNM) are colored green and gray, respectively.

160 Residues in eTA are marked by using single-quotation. Conserved residues between

161 CnKBL and eTA are represented as line model. Different residues between CnKBL

162 and eTA are represented as stick model. H138, H215, F275, Lys222 and R370 in

163 CnKBL are corresponding to H83, R169, H126, P276 and R308 in eTA, respectively.



164

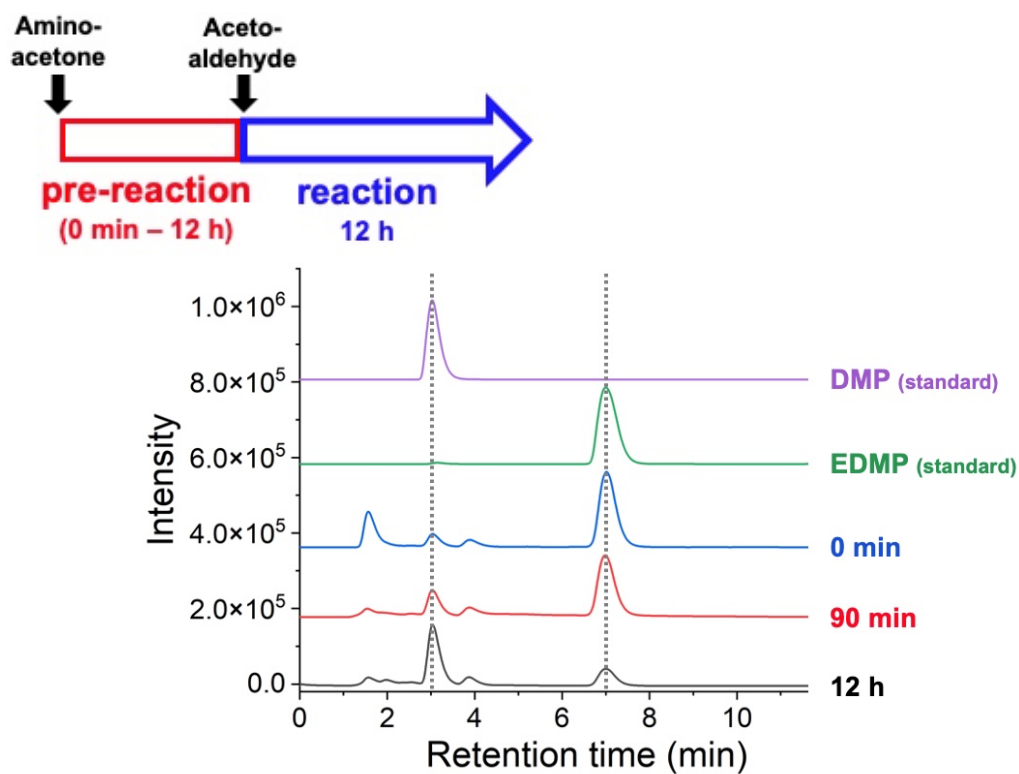

165

166 **Supplementary Fig. 13 HPLC analysis of EDMP and DMP production with or**  
167 **without pre-reaction.**

168 The EDMP and DMP standard are colored green and purple line, respectively. HPLC  
169 analysis was performed after the reaction of aminoacetone and acetaldehyde.

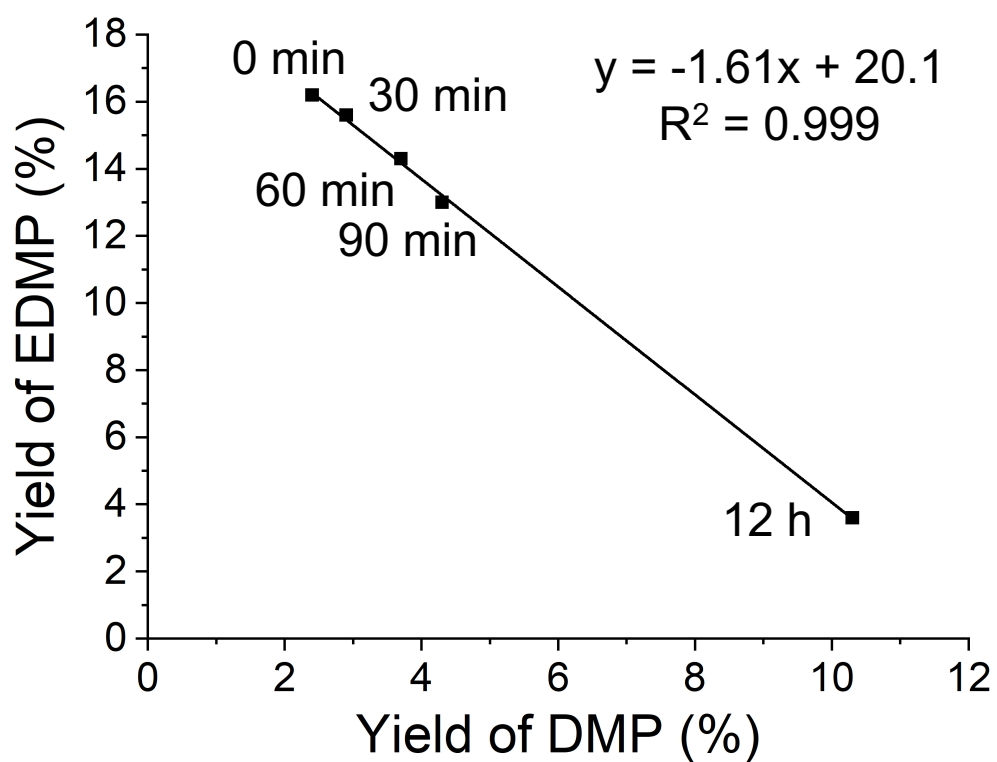

170

171 **Supplementary Fig. 14 Comparison of the yield of EDMP and DMP with different**  
172 **timing of acetaldehyde addition.**

173 This figure was generated from the values shown in entry 5–9 in Supplemental Table

174 6.

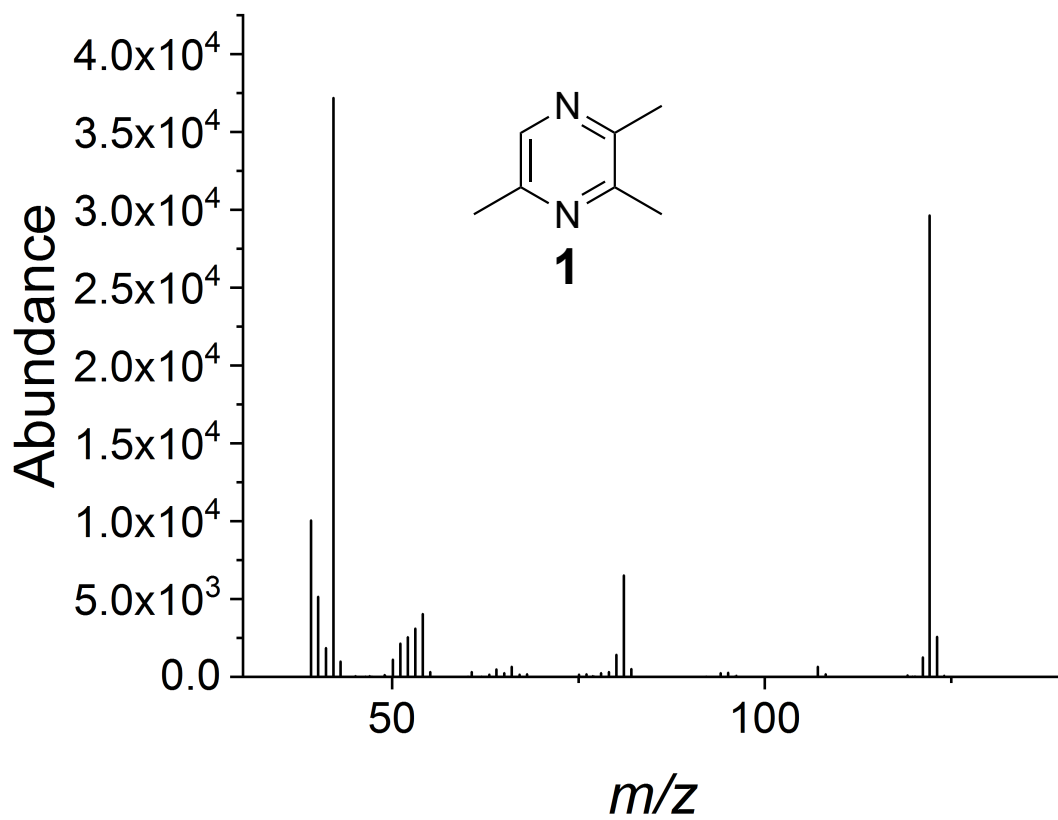

175

176 **Supplementary Fig. 15 MS spectrum for 2,3,5-trimethylpyrazine.**

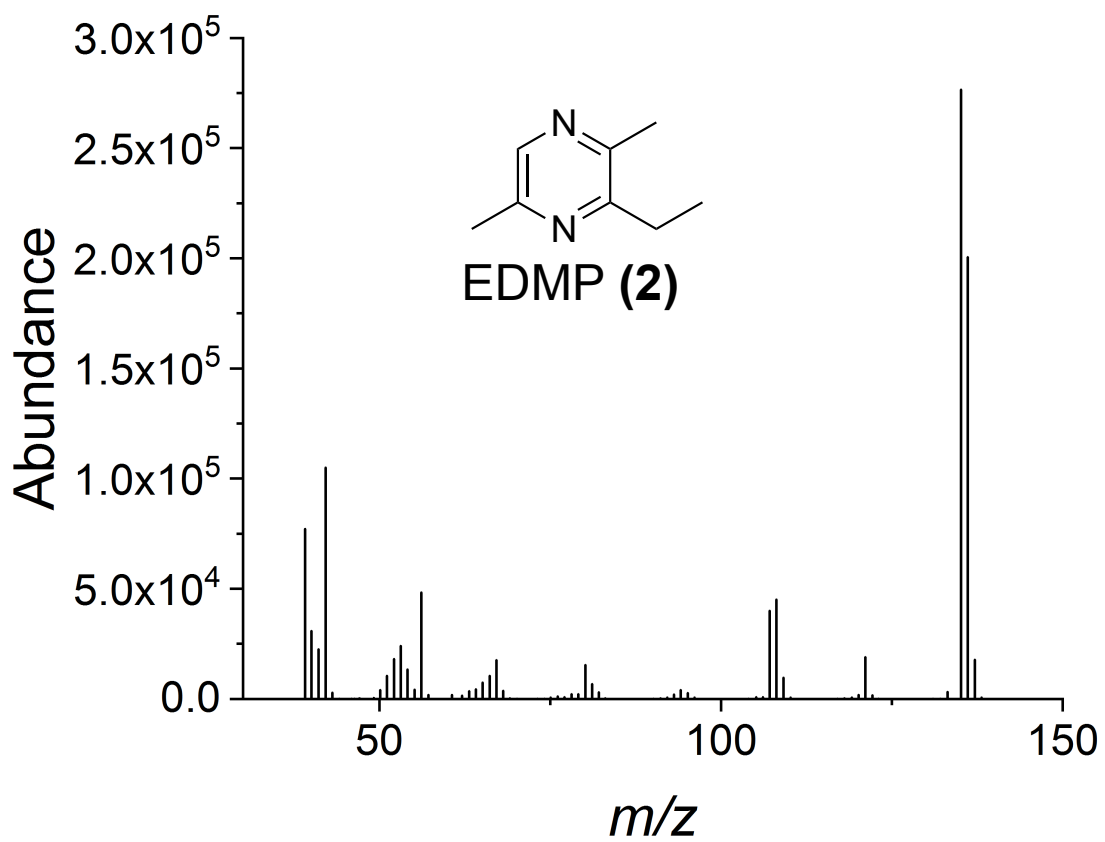

177

178 **Supplementary Fig. 16 MS spectrum for 3-ethyl-2,5-dimethylpyrazine (EDMP).**

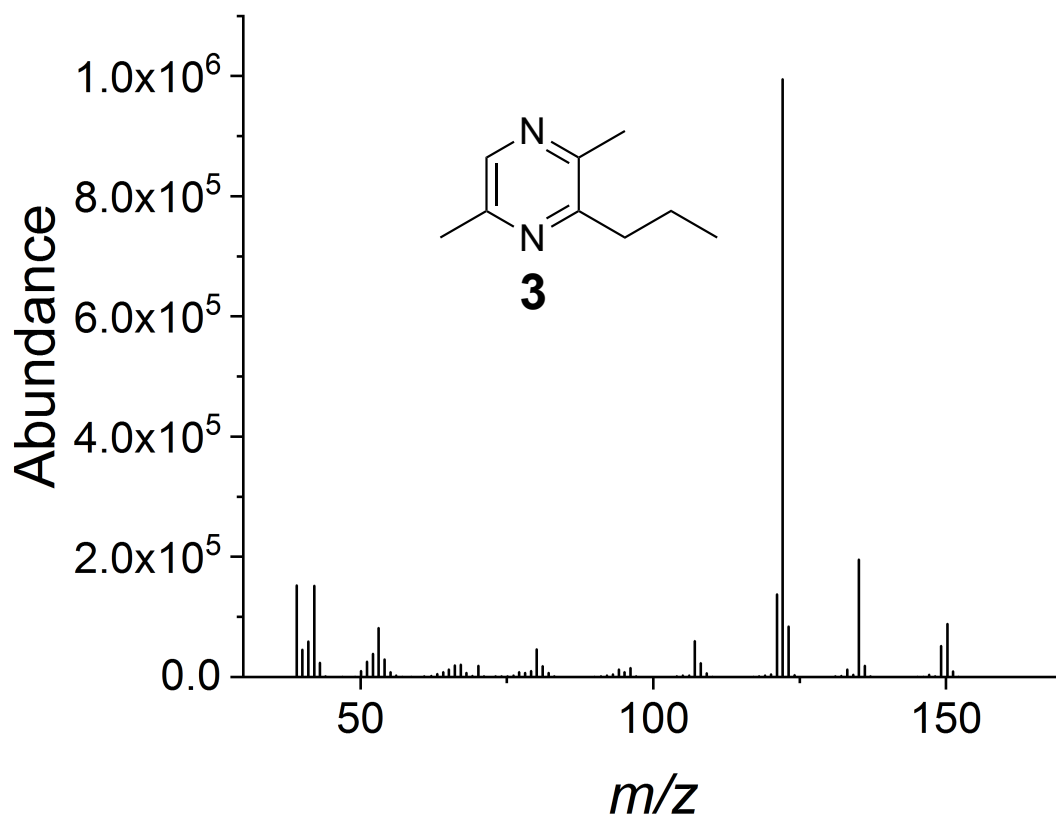

179

180 **Supplementary Fig. 17 MS spectrum for 2,5-dimethyl-3-propylpyrazine.**

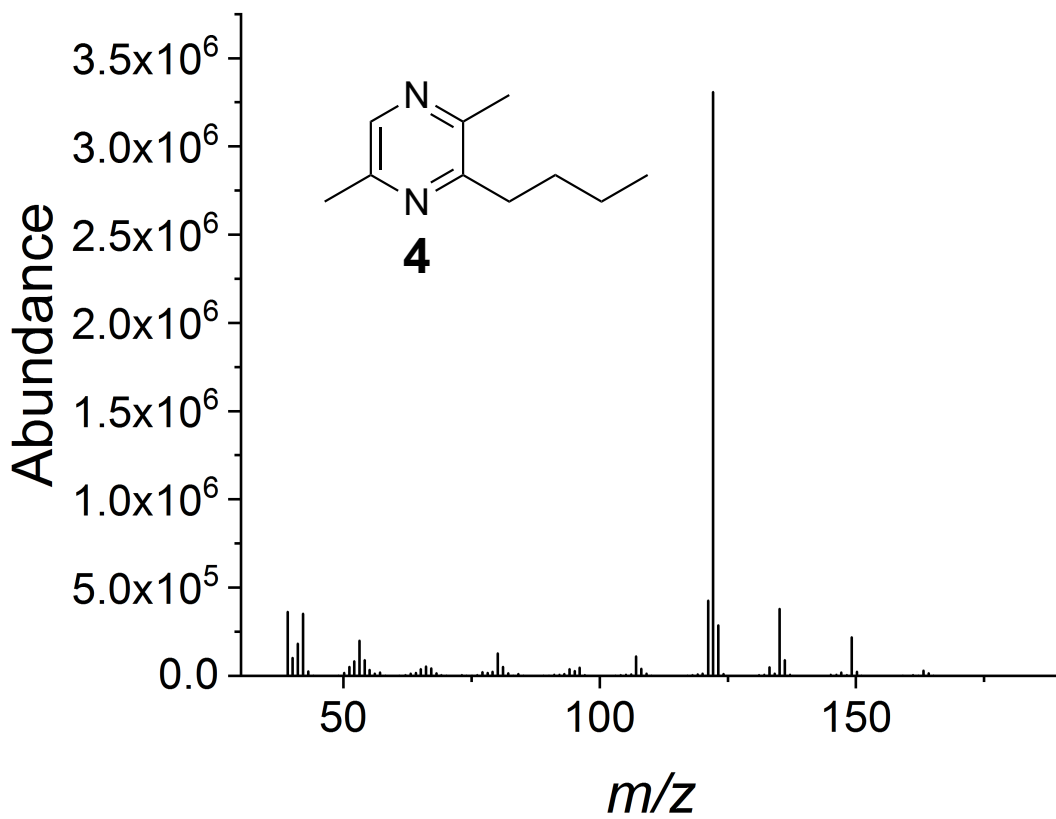

181

182 **Supplementary Fig. 18 MS spectrum for 3-butyl-2,5-dimethylpyrazine.**

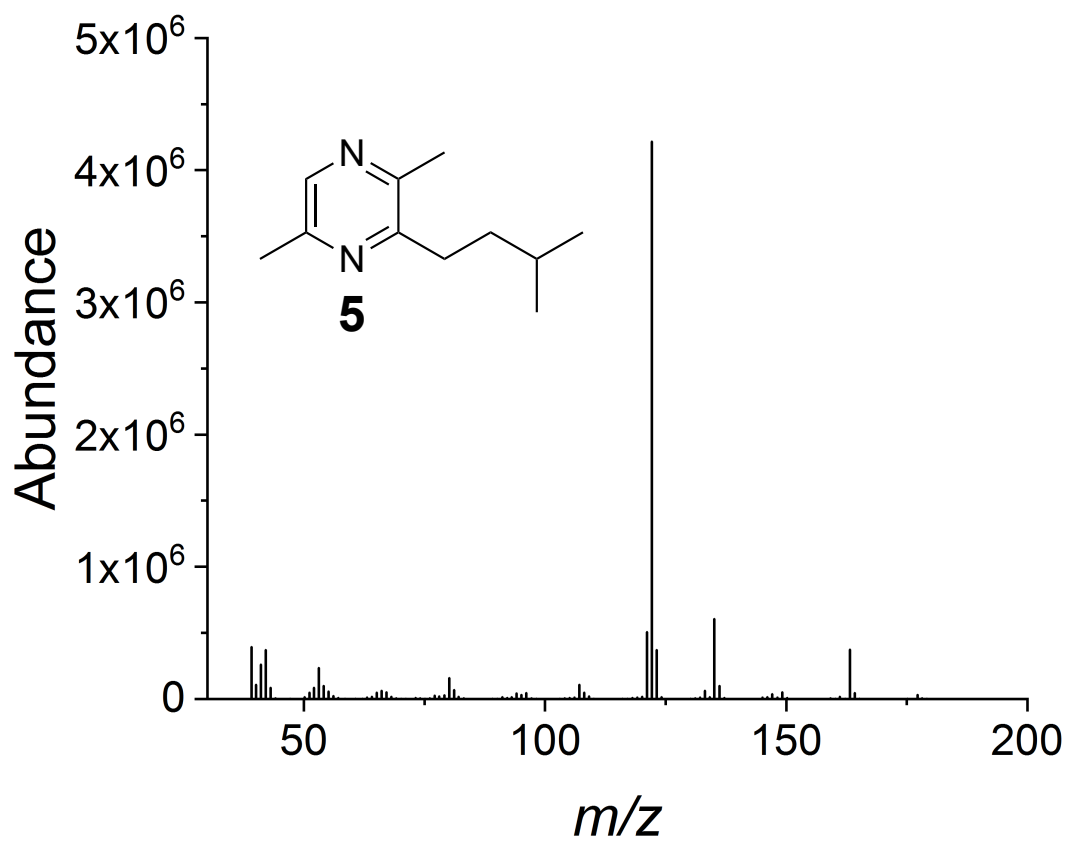

183

184 **Supplementary Fig. 19 MS spectrum for 3-isopentyl-2,5-dimethylpyrazine.**

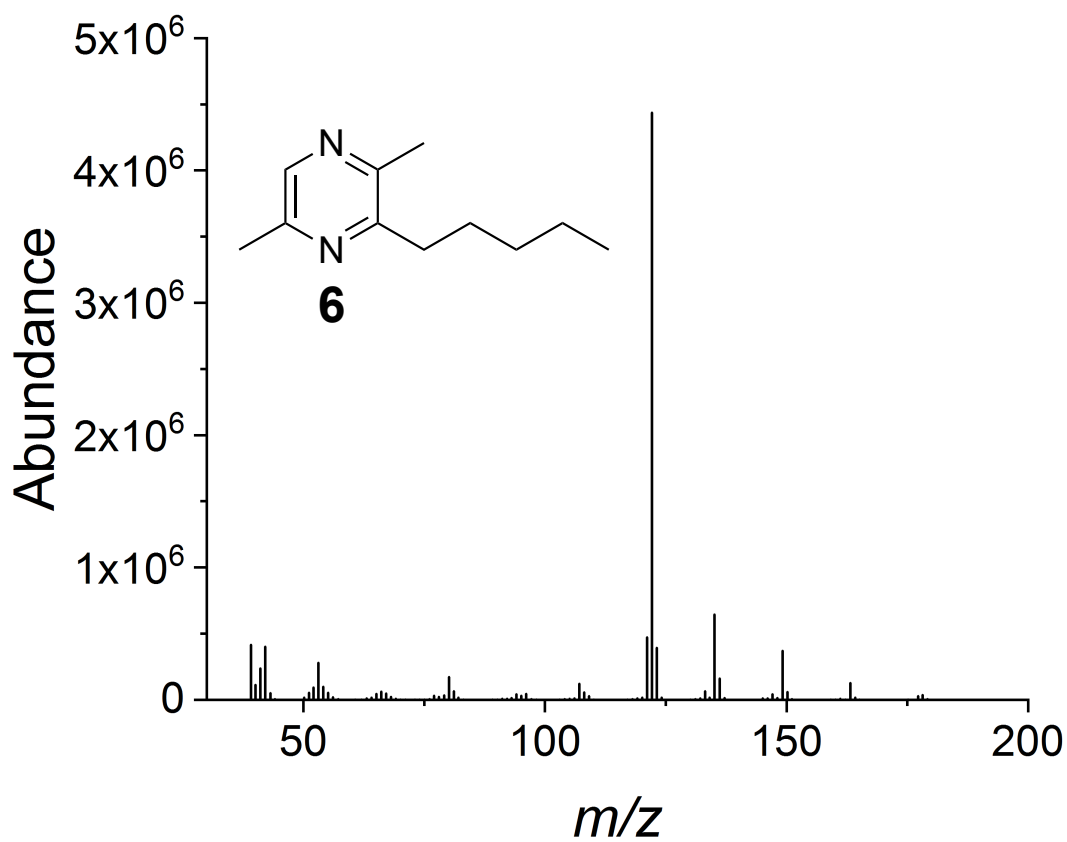

185

186 **Supplementary Fig. 20 MS spectrum for 2,5-dimethyl-3-pentylpyrazine.**



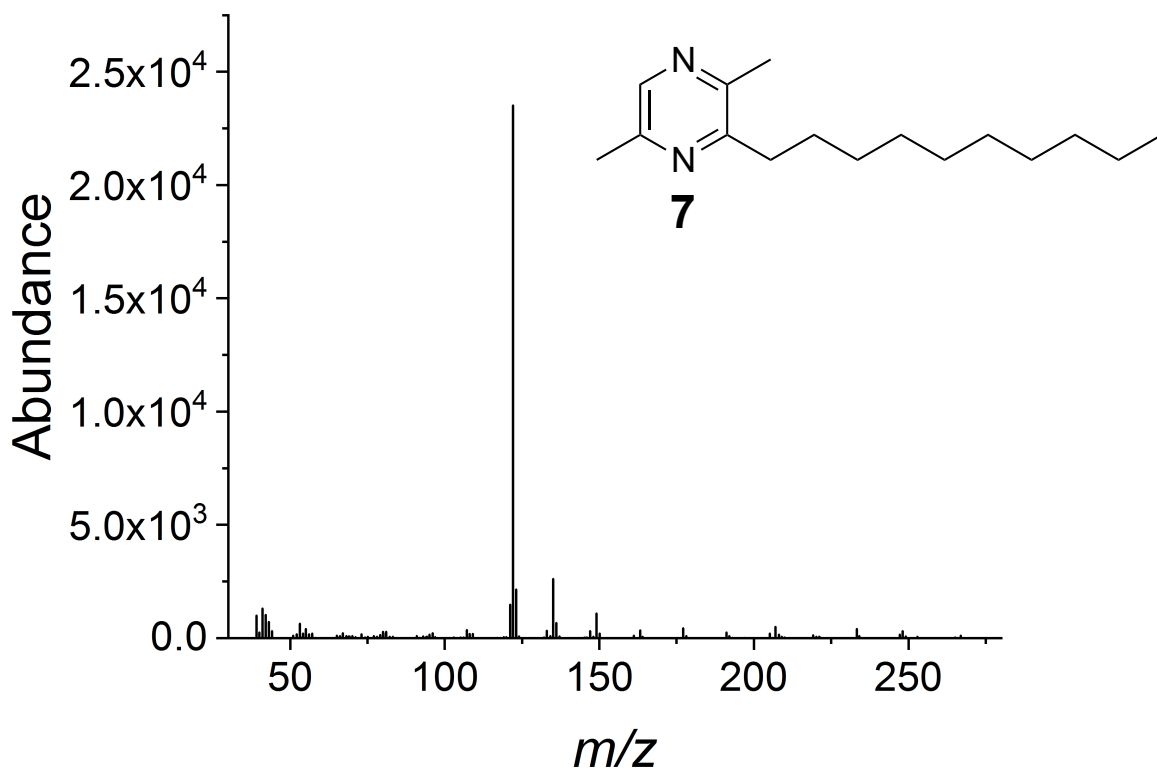

187

188 **Supplementary Fig. 21 MS spectrum for 3-decyl-2,5-dimethylpyrazine.**

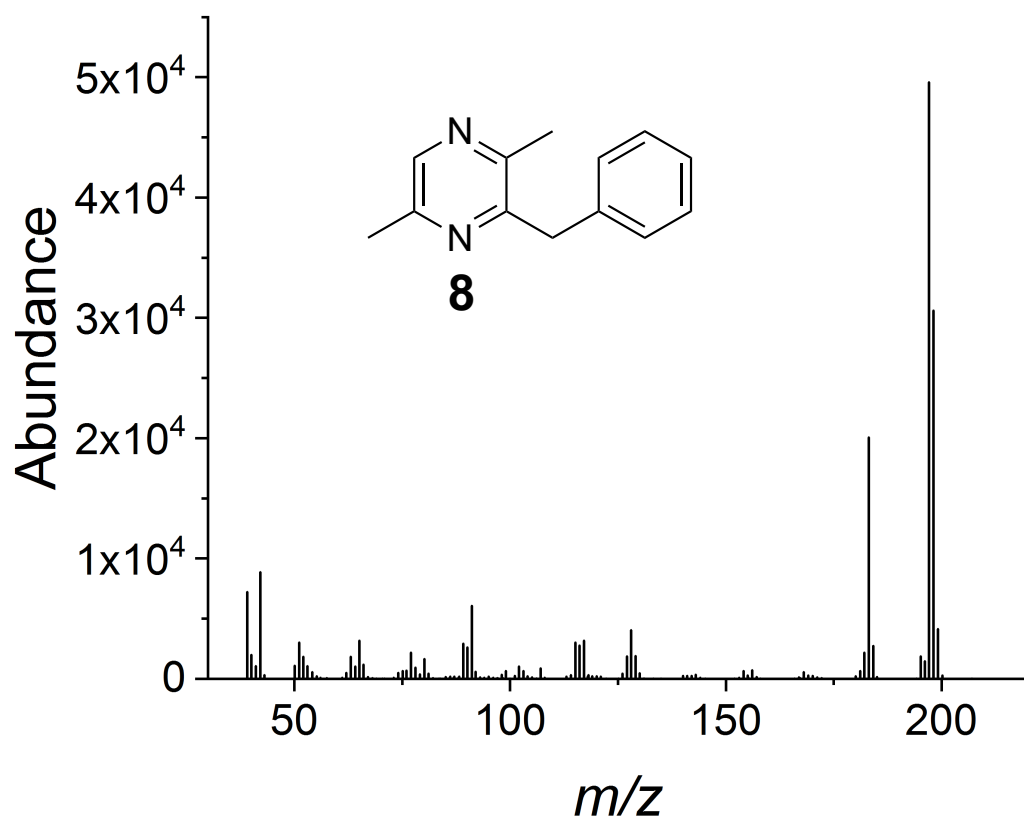

189

190 **Supplementary Fig. 22 MS spectrum for 3-benzyl-2,5-dimethylpyrazine.**

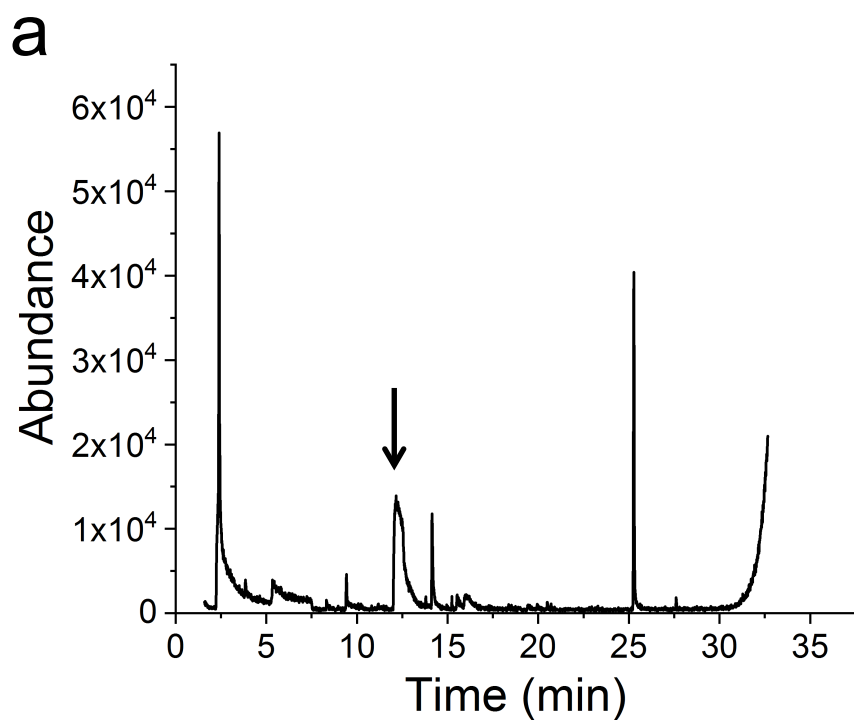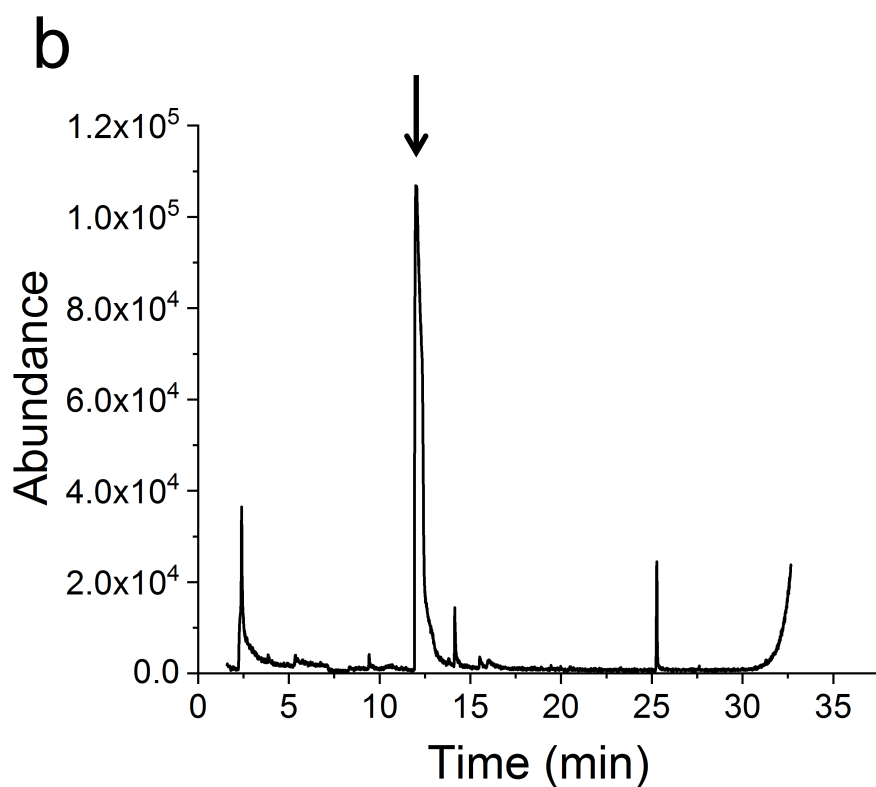

191

192 **Supplementary Fig. 23 GC-MS analysis of EDMP using aminoacetone and**  
193 **acetaldehyde at low concentration.**

194 The peaks can be detected in the reaction condition containing 500 nM (a) and 5  $\mu$ M  
195 (b) aminoacetone and acetaldehyde. The peak of EDMP is represented as an arrow.

196 **Supplementary Table 1 Primers used in this study.**

| Primer         | Sequence (5'→3')                               |
|----------------|------------------------------------------------|
| <i>cnkbl_F</i> | ATATCCATGGGCCATATGATGTCTGAATGCCGAGGC           |
| <i>cnkbl_R</i> | ATATGGATCCTTACTCGAGGATCAGCCCCAGTTCAC           |
| H138F          | ATCAGCGATGCGCTCAACT <u>TTT</u> GCCTCGATCATCGAC |
| K246A          | ATCATTACCGGCACGCTGGGCG <u>GCG</u> GCGCTGGGTGGC |

197

198 **Supplementary Table 2 Annotation of TDH homologues.**

| Accession      | Definition                          | Source                                                   |
|----------------|-------------------------------------|----------------------------------------------------------|
| WP_010813492.1 | L-threonine 3-dehydrogenase         | <i>Cupriavidus necator</i>                               |
| YP_003318149.1 | NAD-dependent epimerase/dehydratase | <i>Thermanaerovibrio acidaminovorans</i> DSM 6589        |
| NP_389581.1    | threonine 3-dehydrogenase           | <i>Bacillus subtilis</i> subsp. <i>subtilis</i> str. 168 |
| NP_233271.1    | L-threonine 3-dehydrogenase         | <i>Vibrio cholerae</i> 01 biovar E1 Tor str. N16961      |

199

200

201

202

203

204

205 **Supplementary Table 3 Annotation of KBL homologues.**

| Accession      | Definition                                                        | Source                                                   |
|----------------|-------------------------------------------------------------------|----------------------------------------------------------|
| WP_011616818.1 | glycine C-acetyltransferase                                       | <i>Cupriavidus necator</i>                               |
| YP_003318148.1 | pyridoxal phosphate-dependent acyltransferase                     | <i>Thermanaerovibrio acidaminovorans</i> DSM 6589        |
| NP_389582.1    | 2-amino-3-ketobutyrate CoA ligase<br>(glycine acetyl transferase) | <i>Bacillus subtilis</i> subsp. <i>subtilis</i> str. 168 |
| NP_233272.1    | 2-amino-3-ketobutyrate CoA ligase                                 | <i>Vibrio cholerae</i> 01 biovar E1 Tor str. N16961      |

206

207 **Supplementary Table 4 Enzymatic properties of CnKBL and EcKBL for KBL**  
 208 **activity.**

|       | $k_{\text{cat}}$ (s <sup>-1</sup> ) <sup>a</sup> | $K_{\text{m, Gly}}$ (mM) <sup>b</sup> | $K_{\text{m, Acetyl-CoA}}$ (μM) <sup>b</sup> | $k_{\text{cat}}/K_{\text{m, Gly}}$ (sec <sup>-1</sup> mM <sup>-1</sup> ) |
|-------|--------------------------------------------------|---------------------------------------|----------------------------------------------|--------------------------------------------------------------------------|
| CnKBL | 3.43 ± 0.036                                     | 13.9 ± 0.52                           | 242.7 ± 10.4                                 | 0.25                                                                     |
| EcKBL | 1.9 <sup>c</sup>                                 | 12.0 <sup>c</sup>                     | 59 <sup>c</sup>                              | 0.16 <sup>c</sup>                                                        |

209 <sup>a</sup>  $k_{\text{cat}}$  value of CnKBL for KBL activity were derived from the data shown in  
 210 Supplementary Fig. 10.

211 <sup>b</sup>  $K_{\text{m, Gly}}$  and  $K_{\text{m, Acetyl-CoA}}$  values represent the Michaelis constant value toward Gly and  
 212 Acetyl-CoA, respectively.

213 <sup>c</sup> Mukherjee, J. J.; Dekker, E. E., Purification, properties, and N-terminal amino  
 214 acid sequence of homogeneous *Escherichia coli* 2-amino-3-ketobutyrate CoA  
 215 ligase, a pyridoxal phosphate-dependent enzyme. *J Biol Chem* **1987**, *262* (30),  
 216 14441-7.

217

218

219

220

221

222

223 **Supplementary Table 5 Enzymatic properties of CnKBL(WT) and two variants**  
 224 **for TA activity.**

|       | $k_{\text{cat}}$ (min <sup>-1</sup> ) <sup>a</sup> | $K_{\text{m}}$ (mM) <sup>b</sup> | $k_{\text{cat}}/K_{\text{m}}$ (min <sup>-1</sup> mM <sup>-1</sup> ) |
|-------|----------------------------------------------------|----------------------------------|---------------------------------------------------------------------|
| WT    | 0.170 ± 0.39                                       | 1.24 ± 0.11                      | 0.14                                                                |
| H138F | n.d. <sup>c</sup>                                  | n.d.                             | n.d.                                                                |
| K246A | n.d.                                               | n.d.                             | n.d.                                                                |

225 <sup>a</sup>  $k_{\text{cat}}$  values of CnKBL for TA activity were derived from the data shown in Fig. 4b.

226 <sup>b</sup>  $K_{\text{m}}$  values represent the Michaelis constant value toward L-Thr.

227 <sup>c</sup> n.d., not determined.

228 **Supplementary Table 6 Yields of EDMP and DMP under chemical or chemoenzymatic reactions.**

| Entry                                                            | Reaction condition                                          | Yield of EDMP (%) (Yield of DMP) <sup>a</sup> |            |            |            |            |
|------------------------------------------------------------------|-------------------------------------------------------------|-----------------------------------------------|------------|------------|------------|------------|
|                                                                  |                                                             | Reaction time                                 |            |            |            |            |
|                                                                  |                                                             | 1 h                                           | 2 h        | 3 h        | 6 h        | 12 h       |
| Chemical reaction (Using aminoacetone and acetaldehyde reagents) |                                                             |                                               |            |            |            |            |
| 1                                                                | 30°C                                                        | -                                             | -          | -          | -          | 16.2       |
| 2                                                                | 40°C                                                        | -                                             | -          | -          | -          | 13.1       |
| 3                                                                | 50°C                                                        | -                                             | -          | -          | -          | 9.9        |
| 4                                                                | 60°C                                                        | -                                             | -          | -          | -          | 3.7        |
| Chemical reaction with pre-reaction (30°C)                       |                                                             |                                               |            |            |            |            |
| 5                                                                | Without pre-reaction                                        | 7.6 (1.4)                                     | 11.0 (1.4) | 12.3 (1.9) | 14.8 (2.4) | 16.2 (2.4) |
| 6                                                                | 30 min pre-reaction                                         | 7.7 (2.4)                                     | 10.5 (3.0) | 11.9 (3.5) | 14.4 (4.8) | 15.6 (2.9) |
| 7                                                                | 60 min pre-reaction                                         | 8.3 (3.4)                                     | 10.9 (3.6) | 11.3 (3.4) | 12.8 (4.8) | 14.3 (3.7) |
| 8                                                                | 90 min pre-reaction                                         | 6.3 (3.8)                                     | 9.4 (4.1)  | 10.3 (4.7) | 11.4 (5.7) | 13.0 (4.3) |
| 9                                                                | 12 h pre-reaction                                           | 1.4 (9.9)                                     | 2.0 (10.2) | 2.3 (10.1) | 3.2 (10.5) | 3.6 (10.3) |
| Chemoenzymatic reaction (30°C)                                   |                                                             |                                               |            |            |            |            |
| 10                                                               | TDH and acetaldehyde (Aminoacetone was provided from L-Thr) | 1.1 (0.3)                                     | 4.3 (0.4)  | 7.6 (0.6)  | 15.2 (1.3) | 23.4 (2.1) |
| 11                                                               | KBL and aminoacetone (Acetaldehyde was provided from L-Thr) | 1.0 (2.5)                                     | 3.1 (3.3)  | 5.1 (3.9)  | 8.2 (4.6)  | 10.8 (5.2) |
| 12                                                               | TDH and KBL (Using L-Thr as substrate)                      | 0.2 (0.5)                                     | 1.6 (1.5)  | 3.9 (2.5)  | 10.7 (4.0) | 20.2 (5.6) |

229 <sup>a</sup> The yield of DMP was shown in the parentheses.
