# Supplementary material for: Chemoenzymatic synthesis of 3-ethyl-2,5-dimethylpyrazine by L-threonine 3-dehydrogenase and 2-amino-3-ketobutyrate CoA ligase/L-threonine aldolase
Source: PubMed Central journal article supplement (PMC9814548; doi:10.1038/s42004-021-00545-8), 2021-07-16
Supplement: 42004_2021_545_MOESM10_ESM.pdf [file 42004_2021_545_MOESM10_ESM.pdf]

## **Description of Additional Supplementary Files**

File Name: Supplementary Data 1

Description: Protein sequences of CnTDH and CnKBL

File Name: Supplementary Data 2

Description: Nucleotide sequences of CnTDH and CnKBL

File Name: Supplementary Data 3

Description: Validation report of 7BXP

File Name: Supplementary Data 4

Description: Validation report of 7BXQ

File Name: Supplementary Data 5

Description: Validation report of 7BXR

File Name: Supplementary Data 6

Description: Validation report of 7BXS
